# Supplementary material for: Polymorphism and Conformational Equilibrium of Nitro-Acetophenone in Solid State and under Matrix Conditions
Source: MDPI journal article supplement (doi:10.3390/molecules26113109), 2021-05-22
Supplement: s1 [file s1]

# Supplementary Material

## Polymorphism and Conformational Equilibrium of Nitro-Acetophenone in Solid State and under Matrix Conditions

Łukasz Hetmańczyk <sup>1</sup>, Przemysław Szklarz <sup>2</sup>, Agnieszka Kwocz <sup>2</sup>, Maria Wierzejewska <sup>2</sup>, Magdalena Pagacz-Kostrzewa <sup>2</sup>, Mikhail Ya. Melnikov <sup>3</sup>, Peter M. Tolstoy <sup>4</sup> and Aleksander Filarowski <sup>2,5,\*</sup>

<sup>1</sup> Faculty of Chemistry, Jagiellonian University, Gronostajowa 2, 30-387 Kraków, Poland; hetmancz@chemia.uj.edu.pl

<sup>2</sup> Faculty of Chemistry, Wrocław University, I14 F. Joliot-Curie st., 50-383 Wrocław, Poland; przemyslaw.szklarz@chem.uni.wroc.pl (P.S.); agnieszka.kwocz@chem.uni.wroc.pl (A.K.); maria.wierzejewska@chem.uni.wroc.pl (M.W.); magdalena.pagacz-kostrzewa@chem.uni.wroc.pl (M.P.-K.)

<sup>3</sup> Department of Chemistry, Moscow State University, F. Joliot-Curie 14, 119991 Moscow, Russia; melnikov46@mail.ru

<sup>4</sup> Institute of Chemistry, St. Petersburg State University, Universitetskij pr. 26, 198504 St. Petersburg, Russia; peter.tolstoy@spbu.ru

<sup>5</sup> Frank Laboratory of Neutron Physics, Joint Institute of Nuclear Research, 141980 Dubna, Russia

\* Correspondence: aleksander.filarowski@chem.uni.wroc.pl; Tel.: +48-71-3757283

**Figure S1.** Schemes of possible pathways of the  $\text{N}=\text{O}\cdots\text{H}-\text{O}$  (A)  $\text{O}-\text{H}\cdots\text{O}=\text{C}$  (B) equilibrium. Potential energy profile for internal rotation was calculated performing a relaxed scan on the DFT (B3LYP)/6-311++G(3df,3pd) PES along the relevant reaction coordinate.

### Approach 1.

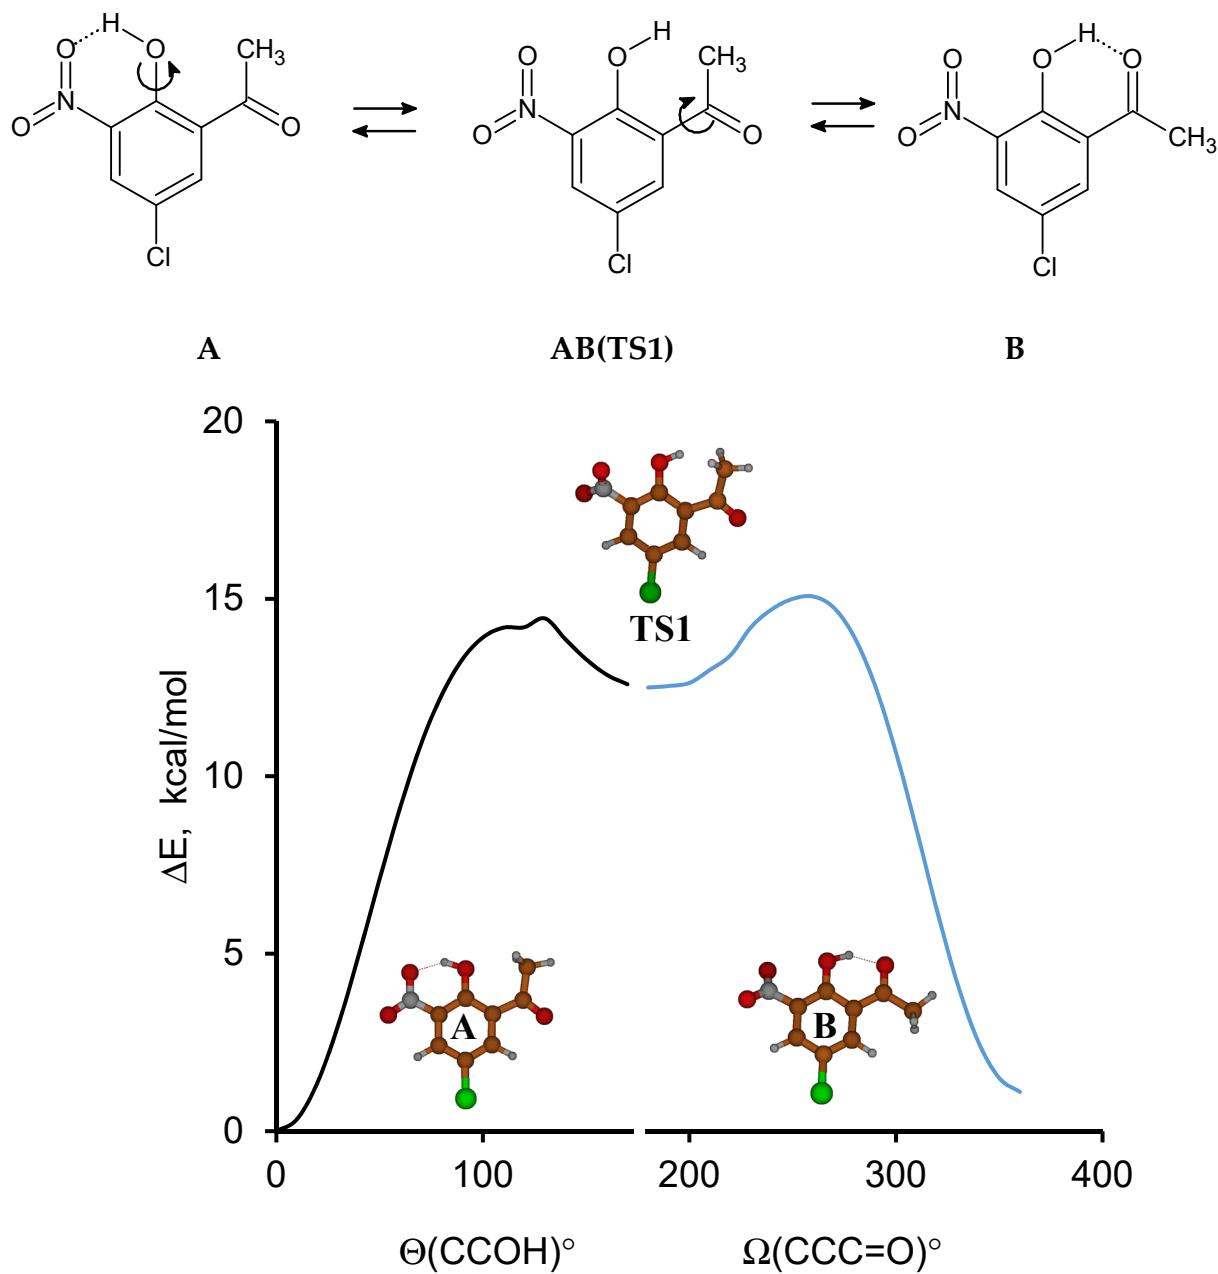

Figure S1 (continuation).

Approach 2.

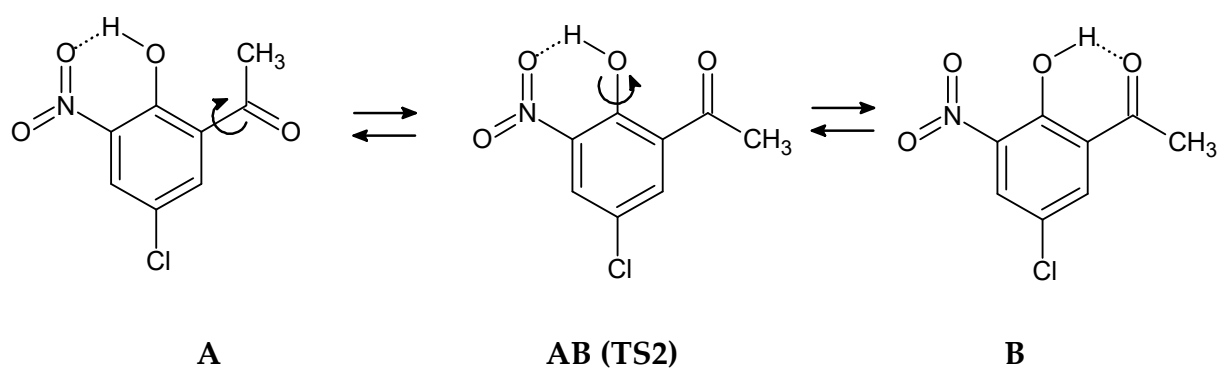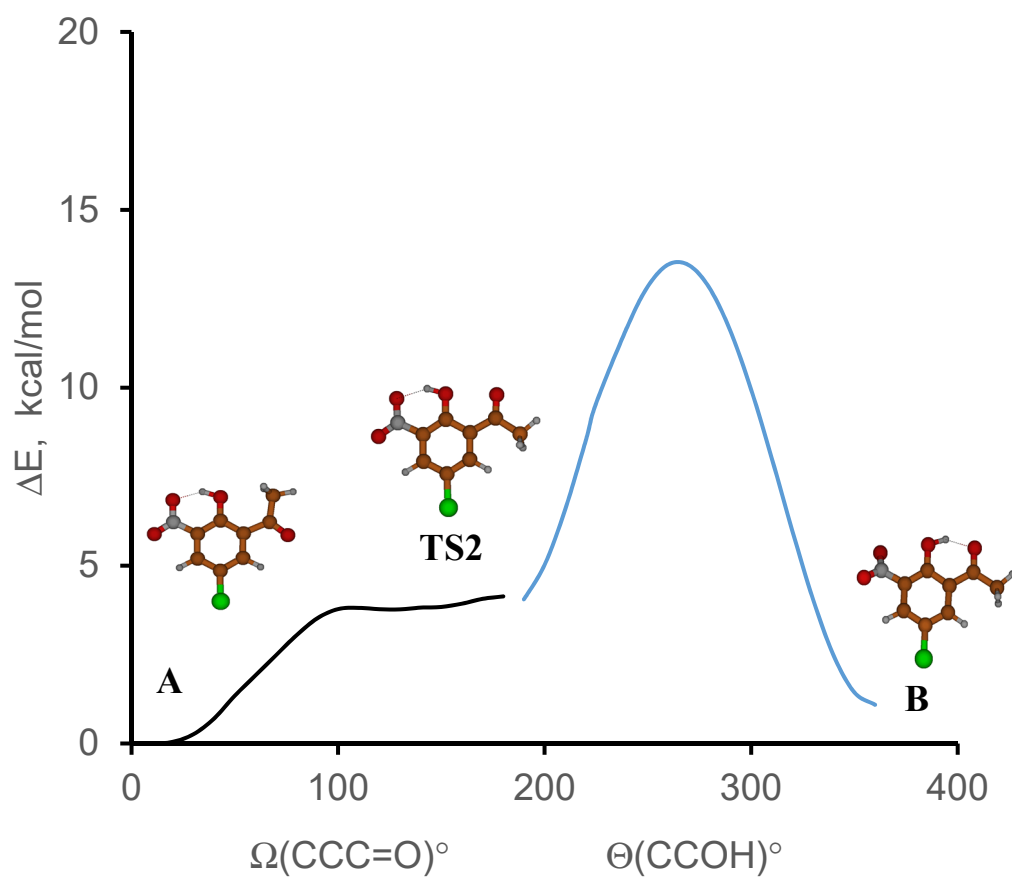

Figure S1 (continuation).

Approach 3.

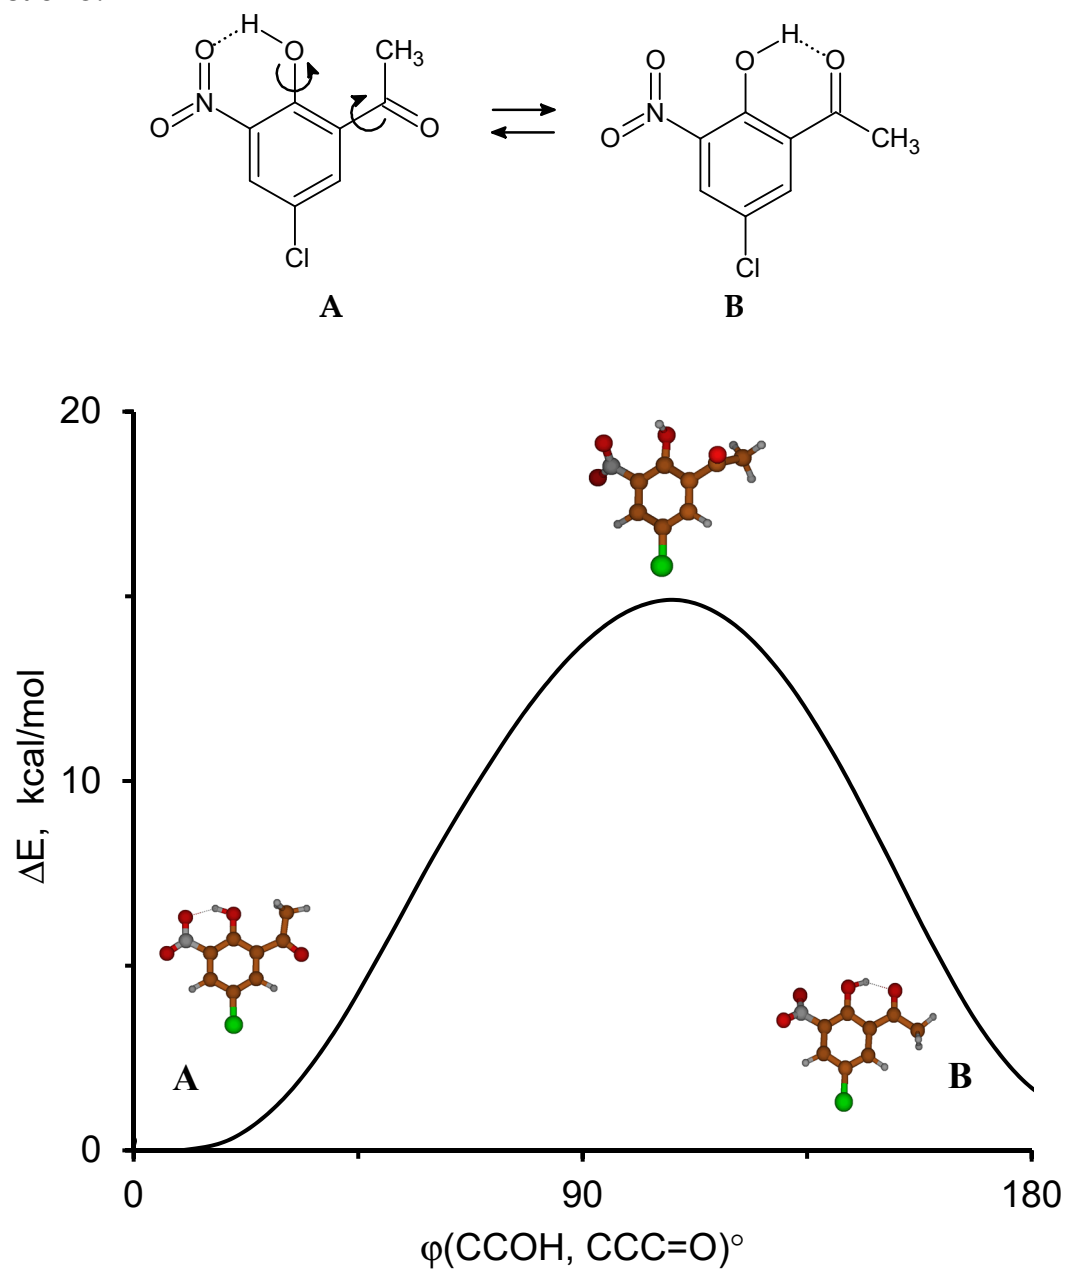

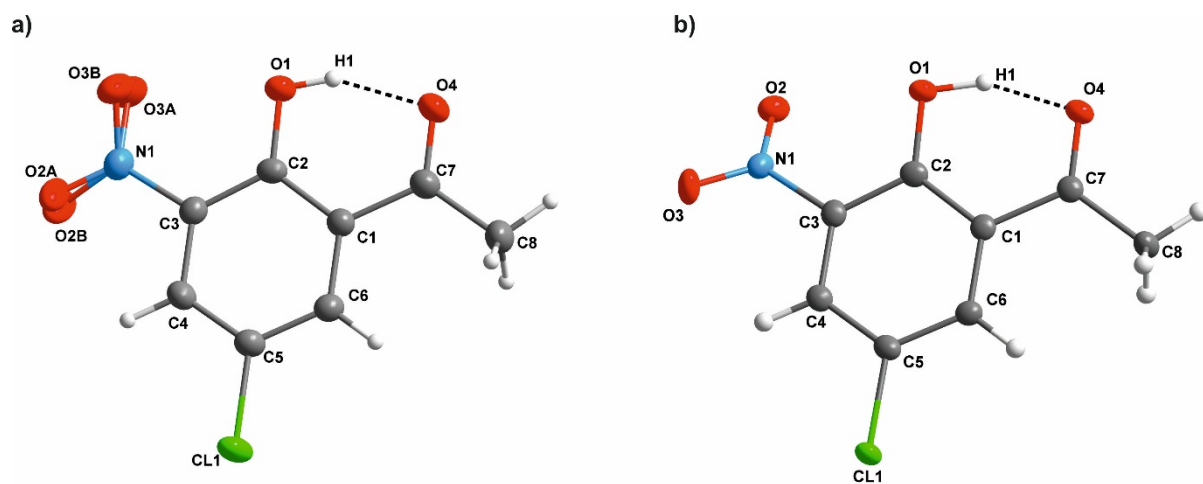

**Figure S2.** The X-ray structure and atom labelling schemes of two polymorphs of 5-chloro-3-nitro-2-hydroxyacetophenone (**a**—polymorph I and **b**—polymorph II). The intramolecular hydrogen bonding is shown as a broken line.

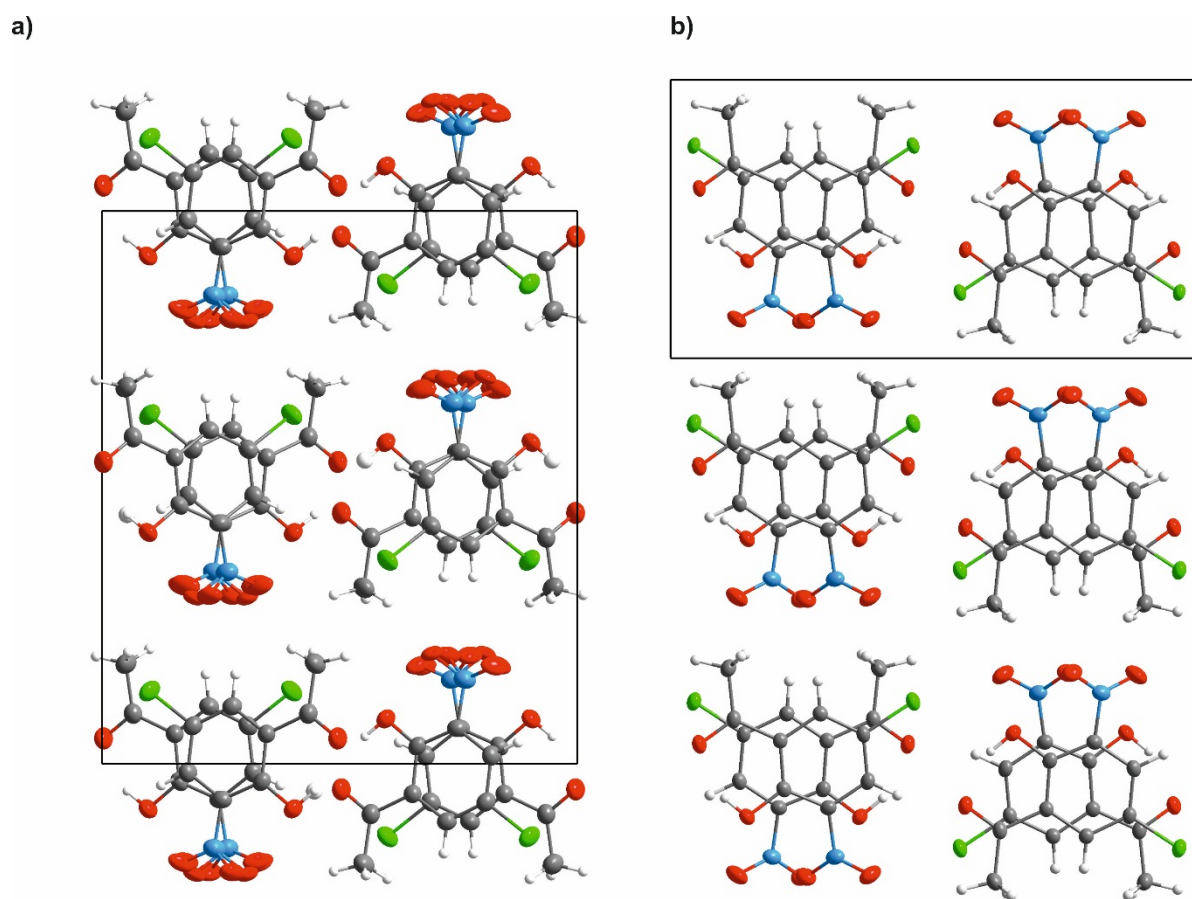

**Figure S3.** Crystal cells of CNK packing of polymorph I (**a**) and polymorph II (**b**).

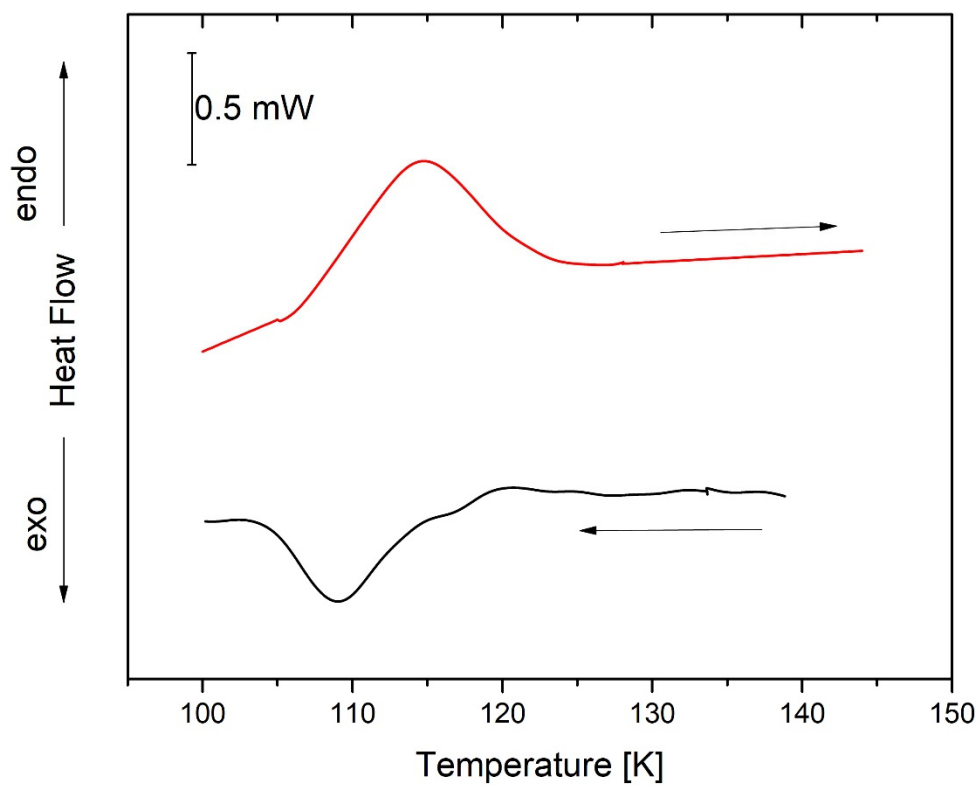

**Figure S4.** DSC cooling and heating runs for polymorph **I** of CNK compound (a ramp rate of 20 K/min). The traces show only one phase transition near 109.9 K (cooling) and 114.5 K (heating).

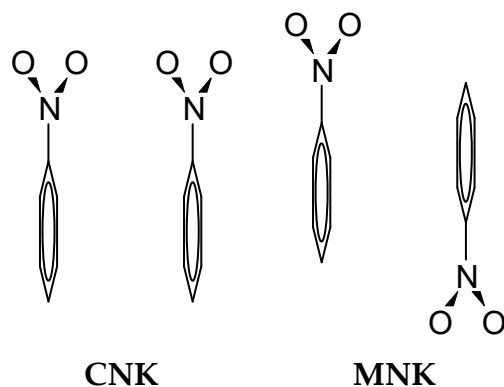

**Figure S5.** The scheme of nitro group positions for 5-chloro-3-nitro-2-hydroxyacetophenone (CNK) and 5-methyl-3-nitro-2-hydroxyacetophenone<sup>22</sup> (MNK) in crystal cell.

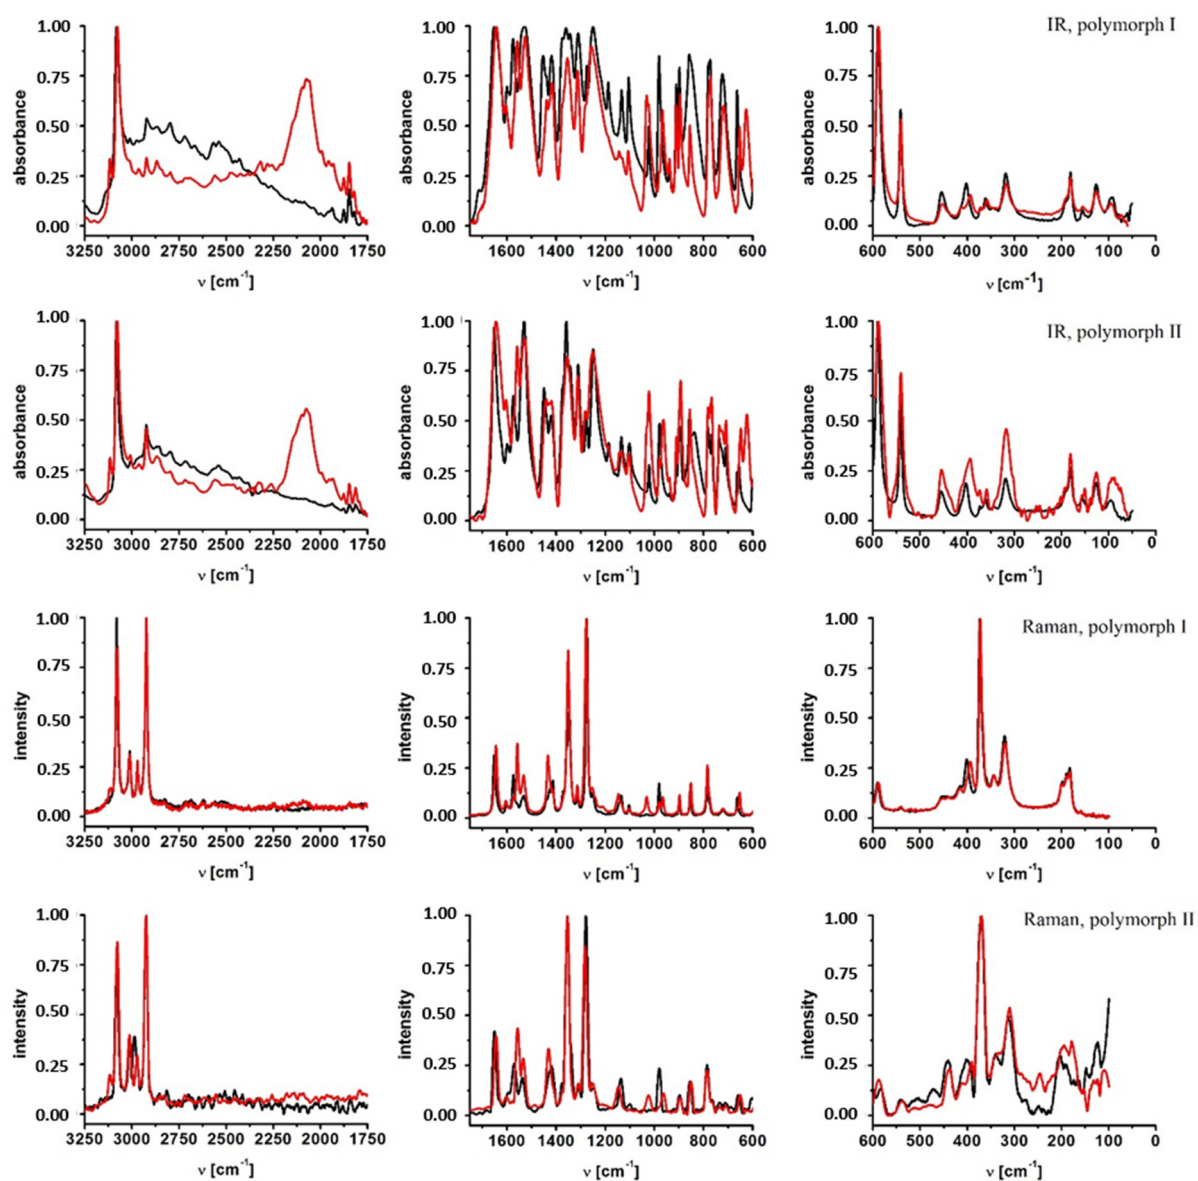

**Figure S6.** IR and Raman spectra (in the solid state) of both polymorphs of 5-chloro-3-nitro-2-hydroxyacetophenone (black line) and its deuterated analogue (red line).

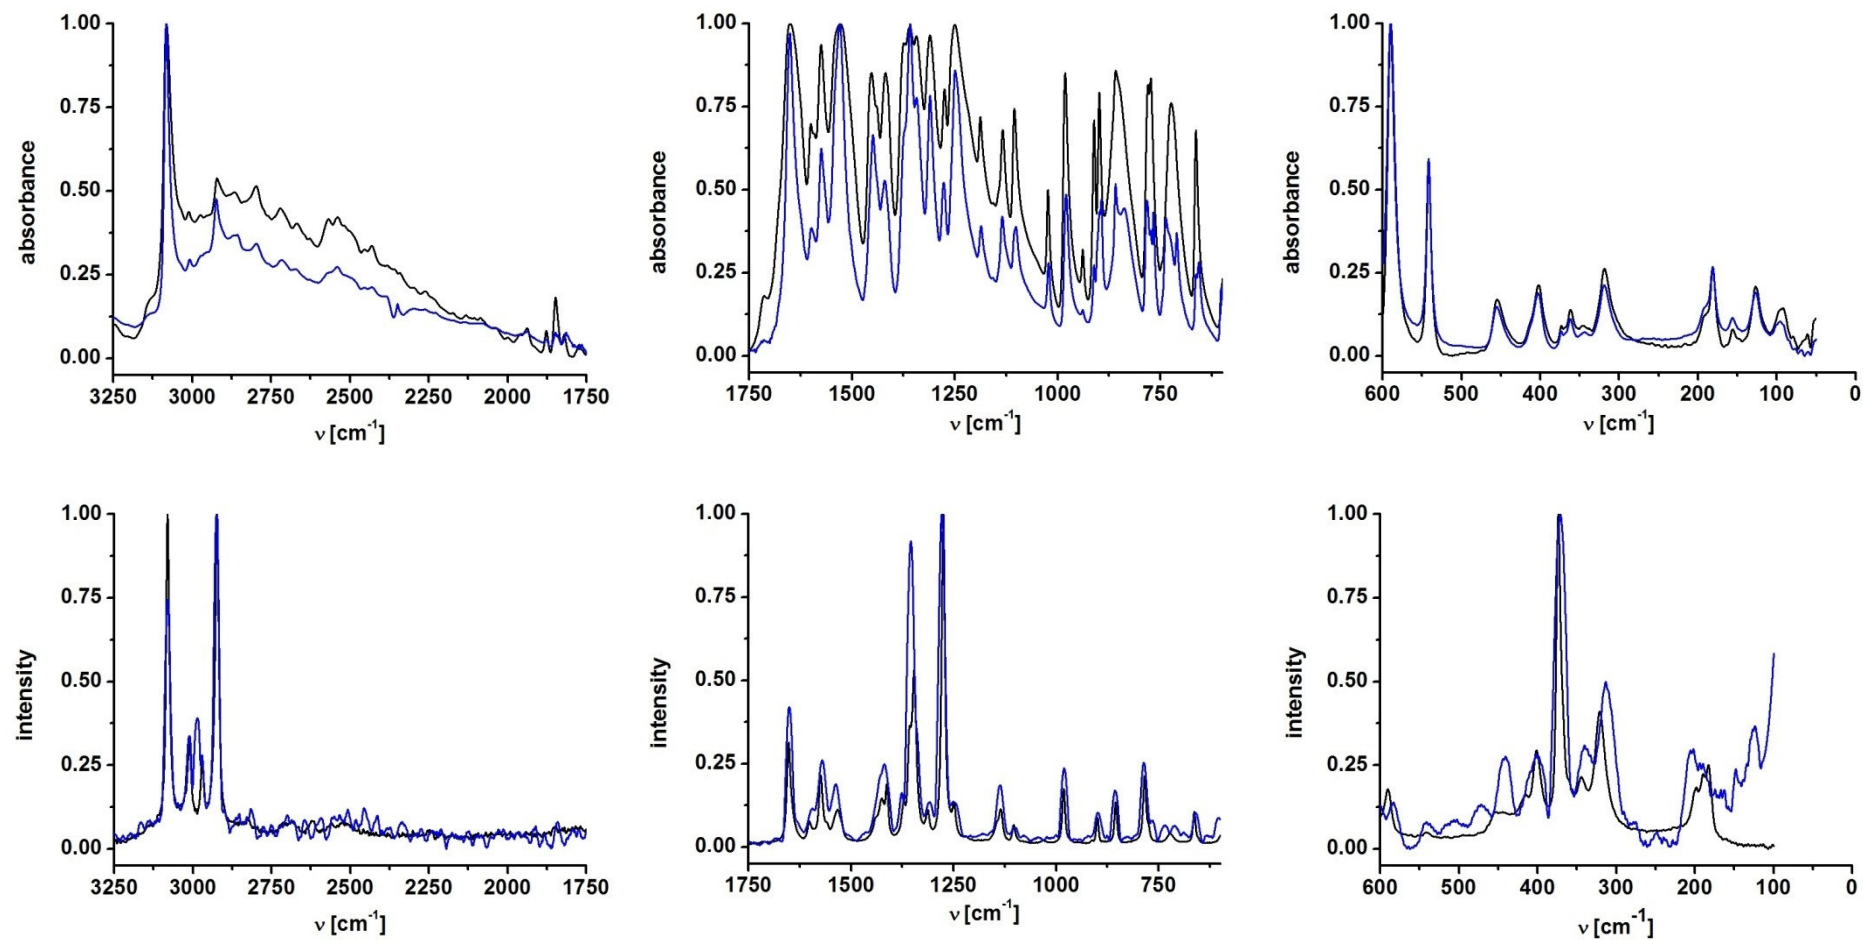

Figure S7. IR (**upper**) and Raman (**bottom**) spectra of polymorphs I (blue lines) and II (black lines).



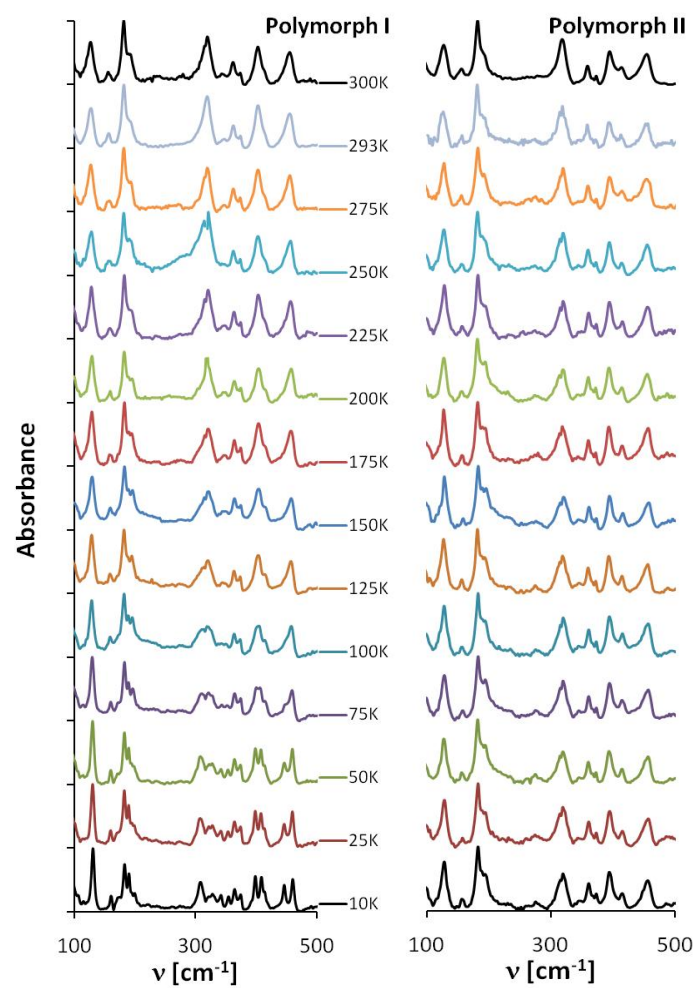

**Figure S8.** Infrared spectra of the CNK polymorphs recorded in the solid state from  $T = 300$  to  $T = 10$  K.

**Table S1.** Definitions of the internal coordinates used in the potential energy distribution (PED) analysis for the assignments of the vibrational spectra.

---

|                                                                                                                                                                                                                                                                      |
|----------------------------------------------------------------------------------------------------------------------------------------------------------------------------------------------------------------------------------------------------------------------|
| $\nu(\text{CC})$ —ring stretching                                                                                                                                                                                                                                    |
| $\nu(\text{C}_{\text{ar}}\text{H})$ —stretching of the $\text{C}_{\text{aryl}}\text{--H}$ bond                                                                                                                                                                       |
| $\nu(\text{C}_{\text{alk}}\text{H})$ —stretching of the $\text{C}_{\text{alkyl}}\text{--H}$ bond                                                                                                                                                                     |
| $\nu(\text{C=O})$ —stretching of the $\text{C}_{\text{alkyl}}\text{=O}$ bond                                                                                                                                                                                         |
| $\nu(\text{OH})$ —stretching of the $\text{O--H}$ bond                                                                                                                                                                                                               |
| $\nu(\text{OD})$ —stretching of the $\text{O--D}$ bond                                                                                                                                                                                                               |
| $\nu^{\text{a}}(\text{NO}_2)$ asymmetric stretching of the nitro group                                                                                                                                                                                               |
| $\nu^{\text{s}}(\text{NO}_2)$ symmetric stretching of the nitro group                                                                                                                                                                                                |
| $\nu(\text{CO})$ —stretching of the $\text{C}_{\text{aryl}}\text{--O}$ bond                                                                                                                                                                                          |
| $\nu(\text{C}_{\text{ar}}\text{C}_{\text{alk}})$ —stretching of the $\text{C}_{\text{aryl}}\text{--C}_{\text{alkyl}}$ bond                                                                                                                                           |
| $\nu(\text{C}_{\text{alk}}\text{C}_{\text{alk}})$ —stretching of the $\text{C}_{\text{alkyl}}\text{--C}_{\text{alkyl}}$ bond                                                                                                                                         |
| $\nu(\text{C--N})$ —stretching of the $\text{C}_{\text{aryl}}\text{--N}$ bond                                                                                                                                                                                        |
| $\nu(\text{CCl})$ —stretching of the $\text{C}_{\text{aryl}}\text{--Cl}$ bond                                                                                                                                                                                        |
| $\alpha(\text{CC})$ —in-plane bending of the phenyl ring                                                                                                                                                                                                             |
| $\delta(\text{CCC}_{\text{alk}})$ —in-plane bending of the $\text{C}_{\text{aryl}}\text{=C}_{\text{aryl}}\text{--C}_{\text{alkyl}}$ chain                                                                                                                            |
| $\delta(\text{CH})$ —in-plane bending of the $\text{C}_{\text{aryl}}\text{=C}_{\text{aryl}}\text{--H}$ chain                                                                                                                                                         |
| $\delta(\text{COH})$ —in-plane bending of the $\text{C}_{\text{aryl}}\text{--O--H}$ chain                                                                                                                                                                            |
| $\delta(\text{COD})$ —in-plane bending of the $\text{C}_{\text{aryl}}\text{--O--D}$ chain                                                                                                                                                                            |
| $\delta(\text{CCO})$ —in-plane bending of the $\text{C}_{\text{aryl}}\text{=C}_{\text{aryl}}\text{--O}$ chain                                                                                                                                                        |
| $\delta(\text{CCl})$ —in-plane bending of the $\text{C}_{\text{aryl}}\text{=C}_{\text{aryl}}\text{--Cl}$ chain                                                                                                                                                       |
| $\delta(\text{CCH}_3)$ —in-plane bending of the $\text{C}_{\text{alkyl}}\text{--CH}_3$ unit                                                                                                                                                                          |
| $\delta(\text{NO}_2)$ —in-plane bending of the $\text{C--NO}_2$ chain                                                                                                                                                                                                |
| $\delta(\text{CC=O})$ —in-plane bending of the $\text{C}_{\text{aryl}}\text{--C}_{\text{alkyl}}\text{=O}$ chain                                                                                                                                                      |
| $\delta(\text{CCN})$ —in-plane bending of the $\text{C}_{\text{aryl}}\text{=C}_{\text{aryl}}\text{--N}$ unit                                                                                                                                                         |
| $\delta(\text{CC}_{\text{alk}}\text{C}_{\text{alk}})$ —in-plane bending of the $\text{C}_{\text{aryl}}\text{--C}_{\text{alkyl}}\text{--C}_{\text{alkyl}}$ chain                                                                                                      |
| $\gamma(\text{COH})$ —out-of-plane bending of the $\text{O--H}$ bond (the change in angle between the $\text{O--H}$ and $\text{C--O}$ bonds)                                                                                                                         |
| $\gamma(\text{COD})$ —out-of-plane bending of the $\text{O--D}$ bond (the change in angle between the $\text{O--H}$ and $\text{C--O}$ bonds)                                                                                                                         |
| $\gamma(\text{CCN})$ —out-of-plane bending of the $\text{C--N}$ bond (the change in angle between the $\text{C}_{\text{aryl}}\text{--N}$ and $\text{C}_{\text{aryl}}\text{=C}_{\text{aryl}}$ bonds)                                                                  |
| $\gamma(\text{CNO}_2)$ —out-of-plane bending of the $\text{NO}$ bond (the change in angle between the $\text{C}_{\text{aryl}}\text{--N}$ and $\text{N=O}$ bonds)                                                                                                     |
| $\gamma(\text{CCC}_{\text{alk}})$ —out-of-plane bending of the $\text{C}_{\text{aryl}}\text{--C}_{\text{alkyl}}$ (the change in angle between the $\text{C}_{\text{aryl}}\text{--C}_{\text{alkyl}}$ bond and plane defined by three carbon atoms in the phenyl ring) |
| $\gamma(\text{CCH})$ —out-of-plane bending of the $\text{C}_{\text{aryl}}\text{--H}$ (the change in angle between the $\text{C}_{\text{aryl}}\text{--H}$ bond and plane defined by three carbon atoms in the phenyl ring)                                            |
| $\gamma(\text{CCO})$ —out-of-plane bending of the $\text{C}_{\text{aryl}}\text{--O}$ (the change in angle between the $\text{C}_{\text{aryl}}\text{--O}$ bond and plane defined by three carbon atoms in the phenyl ring)                                            |
| $\gamma(\text{CC=O})$ —out-of-plane bending of the $\text{C}_{\text{alkyl}}\text{=O}$ (the change in angle between the $\text{C}_{\text{alkyl}}\text{=O}$ bond and plane defined by three carbon atoms)                                                              |
| $\gamma(\text{CCCl})$ —out-of-plane bending of the $\text{C}_{\text{aryl}}\text{--Cl}$ (the change in angle between the $\text{C}_{\text{aryl}}\text{--Cl}$ bond and plane defined by three carbon atoms in the phenyl ring)                                         |
| $\tau(\text{CC})$ —torsion angle in the ring (change in the dihedral angle between two $\text{C}_{\text{aryl}}\text{=C}_{\text{aryl}}\text{=C}_{\text{aryl}}$ planes in the phenyl ring)                                                                             |
| $\tau(\text{CH}_3)$ —torsion around the $\text{C}_{\text{alkyl}}\text{--C}_{\text{alkyl}}$ bond                                                                                                                                                                      |
| $\tau(\text{NO}_2)$ —torsion around the $\text{C}_{\text{alkyl}}\text{--N}$ bond                                                                                                                                                                                     |
| $\tau(\text{CC}_{\text{alk}})$ —torsion angle in the ring (change in the dihedral angle between $\text{C}_{\text{aryl}}\text{=C}_{\text{aryl}}\text{=C}_{\text{aryl}}$ and $\text{C}_{\text{aryl}}\text{=C}_{\text{aryl}}\text{--C}_{\text{alkyl}}$ planes)          |

---

**Table S2.** Experimental infrared (IR<sub>exp</sub>), Raman (R<sub>exp</sub>) and calculated DFT (6-311++G(2d,2p)) spectroscopic data for 5-chloro-3-nitro-2-hydroxyacetophenone (polymorphs **I** and **II**) and its mono deuterated derivative (OD) in the solid state at different temperatures. Potential Energy Distribution (PED) calculated with GAR2PED program.<sup>42</sup>

| IR <sub>exp</sub> | -      | -           | -      | -           | -      | R <sub>exp</sub> | -      | R <sub>exp</sub> | -      | DFT DFT DFT      | PED                                                                                      |
|-------------------|--------|-------------|--------|-------------|--------|------------------|--------|------------------|--------|------------------|------------------------------------------------------------------------------------------|
| <b>I</b>          | -      | <b>II</b>   | -      | <b>I</b>    | -      | <b>I</b>         | -      | <b>II</b>        | -      |                  |                                                                                          |
| 300 K             | 300 K  | 300 K       | 300 K  | 5 K         | 5 K    | 300 K            | 300 K  | 300 K            | 300 K  | Freq.            | IR(A) R(I)                                                                               |
| OH                | OD     | OH          | OD     | OH          | OD     | OH               | OD     | OH               | OD     | OH               |                                                                                          |
| 3138              |        | 3138w       |        |             |        |                  |        |                  |        |                  |                                                                                          |
|                   | 3117w  |             | 3116   |             | 3119w  |                  | 3115w  |                  | 3115m  | 3127             |                                                                                          |
| 3081s             | 3077s  | 3083s       | 3078   | 3083s       | 3079s  | 3080m            | 3078m  | 3080             | 3077w  | 3119 12.2 52.5   | v(C <sub>ar</sub> H) 99                                                                  |
| 3011w             | 3011sh |             | 3015   | 3012w       |        | 3011w            | 3013w  | 3011             | 3012w  | 3057 0.1 51.2    | v(C <sub>ar</sub> H) 99                                                                  |
|                   | 2964w  | 2968w       | 2968   |             |        | 2971w            | 2971w  | 2975             | 2973w  | 3006 0.1 115.8   | v(C <sub>alk</sub> H) 99                                                                 |
| 2921w             | 2923w  | 2924w       | 2924   | 2921w       | 2922w  | 2925s            | 2922s  | 2925             | 2925s  | 3006 3.3 46.3    | v(C <sub>alk</sub> H) 99                                                                 |
|                   | 2866w  |             | 2866   |             | 2871w  |                  |        |                  |        | 2944 0.8 161.0   | v(C <sub>alk</sub> H) 100                                                                |
| 3000-2100vb       |        | 3000-2100vb |        | 3000-2100vb |        |                  |        |                  |        | 3077 491.4 113.3 | v(OH) 98                                                                                 |
|                   | 2076vb |             | 2075vb |             | 2078vb |                  |        |                  |        |                  | v(OD)*                                                                                   |
| 1650s             | 1644s  | 1650s       | 1644s  | 1651s       | 1645s  | 1652s            | 1644s  | 1650s            | 1643s  | 1664 291.6 62.6  | v(C=O) 52, δ(CCC <sub>alk</sub> ) 8                                                      |
| 1601w             | 1603s  | 1600w       | 1604s  | 1601w       | 1604w  | 1600w            | 1605w  | 1596m            | 1603w  | 1595 50.0 9.8    | v(CC) 45, v(C=O) 13, v <sup>a</sup> (NO <sub>2</sub> ) 7, δ(CH) 7                        |
| 1575s             | 1575w  | 1575s       | 1577sh | 1577s       | 1576w  | 1574m            | 1575m  | 1570m            |        | 1563 110.5 48.6  | v(CC) 45, δ(COH) 19, δ(CCO) 7, δ(CH) 6, α(CC) 6                                          |
|                   | 1558s  |             | 1558s  | 1559w       | 1559s  | 1560w            | 1558s  |                  | 1556s  |                  |                                                                                          |
| 1530s             | 1526s  | 1528s       | 1528s  | 1528s       | 1527s  | 1533w            | 1531m  | 1540m            | 1532s  | 1551 213.3 22.7  | v <sup>as</sup> (NO <sub>2</sub> ) 68, v(CC) 6                                           |
| 1452s             |        | 1450s       |        | 1453s       | 1452sh |                  |        |                  |        | 1433 205.0 9.0   | v(CC) 27, δ(COH) 19, v(CO) 16, δ(CH) 10                                                  |
|                   | 1438s  |             | 1439s  | 1439sh      | 1440s  | 1443sh           |        |                  |        |                  | δ(COD)*                                                                                  |
|                   |        |             |        |             |        | 1425m            | 1433s  | 1419m            | 1430s  | 1432 13.6 9.8    | δ(CCH <sub>3</sub> ) 94                                                                  |
| 1418s             | 1417s  | 1418s       | 1418s  | 1418s       | 1418s  | 1413m            | 1413sh | 1412m            | 1410w  | 1422 58.1 15.4   | δ(CCH <sub>3</sub> ) 70, v(CO) 6                                                         |
|                   |        |             |        |             |        |                  |        |                  |        | 1407 3.1 33.5    | v(CC) 30, v(C=O) 11, v(CO) 9, δ(COH) 7, δ(CCH <sub>3</sub> ) 7, δ(CCC <sub>alk</sub> ) 5 |
| 1374w             | 1375sh | 1374sh      |        | 1375m       | 1374sh | 1372w            |        | 1378m            | 1377sh | 1372 101.5 21.3  | v(CC) 24, δ(COH) 22, δ(CH) 14, v(C <sub>ar</sub> C <sub>alk</sub> ) 5                    |
|                   |        |             |        |             |        |                  |        |                  |        | 1353 54.4 5.6    | δ(CCH <sub>3</sub> ) 66, v(C <sub>alk</sub> C <sub>alk</sub> ) 11                        |
| 1360s             | 1354s  | 1360s       | 1355s  | 1361s       | 1355s  | 1357s            | 1351s  | 1354s            | 1353s  | 1333 223.8 99.8  | v <sup>s</sup> (NO <sub>2</sub> ) 49, v(C-N) 17, δ(NO <sub>2</sub> ) 13, δ(CH) 5         |
| 1341w             |        | 1341w       |        | 1344w       |        | 1346s            |        | 1339sh           |        |                  |                                                                                          |

|       |        |       |        |       |        |       |       |       |       |      |       |      |                                                                                                                                                          |
|-------|--------|-------|--------|-------|--------|-------|-------|-------|-------|------|-------|------|----------------------------------------------------------------------------------------------------------------------------------------------------------|
| 1310s | 1312s  | 1310s | 1311s  | 1311s | 1314s  | 1313w | 1313w | 1308w | 1310w | 1302 | 61.6  | 13.6 | v(CC) 40, v(C <sub>ar</sub> C <sub>alk</sub> ) 12, δ(CC=O) 11, δ(CCH <sub>3</sub> ) 9, δ(CCC <sub>alk</sub> ) 6                                          |
|       |        |       |        |       |        |       |       | 1299w |       |      |       |      |                                                                                                                                                          |
| 1275s | 1282sh | 1275s | 1281s  | 1276w | 1282sh | 1274s | 1277s | 1281s | 1281s | 1284 | 37.9  | 83.9 | v(CO) 29, v(CC) 34, δ(CH) 12                                                                                                                             |
| 1251s | 1257s  | 1250s | 1250s  | 1252s | 1258s  | 1249w | 1253w | 1248w | 1248w | 1238 | 258.5 | 14.4 | v(C <sub>ar</sub> C <sub>alk</sub> ) 22, δ(CH) 17, v(CC) 29, v(C <sub>alk</sub> C <sub>alk</sub> ) 6                                                     |
| 1187m | 1190sh | 1187m | 1185sh | 1189m | 1190w  |       |       |       |       | 1170 | 1.1   | 5.6  | δ(CH) 32, v(CC) 24, δ(CCO) 10, v(C-N) 8, δ(COH) 6                                                                                                        |
|       | 1143w  |       | 1143w  |       | 1145w  |       | 1146w |       | 1145w |      |       |      |                                                                                                                                                          |
| 1133s | 1133w  | 1134m | 1134w  | 1134m | 1134w  | 1134w | 1135w | 1137m |       | 1112 | 29.6  | 31.8 | v(CC) 32, δ(CH) 18, v(CCl) 12, v(C <sub>alk</sub> C <sub>alk</sub> ) 6                                                                                   |
| 1106s | 1107m  | 1101m | 1105w  | 1106m | 1107w  | 1103w | 1104w | 1096w |       | 1078 | 35.0  | 4.9  | α(CC)21, v(CC)17, δ(CCH <sub>3</sub> )10, v(C-N)9, δ(CH)8, v(C <sub>alk</sub> C <sub>alk</sub> )7, δ(CH)6                                                |
| -     | 1032s  | -     | 1032sh | 1035w | 1034s  | 1031w | 1031w |       |       |      |       |      |                                                                                                                                                          |
| 1023s | 1023s  | 1021m | 1022s  | 1024m | 1024m  |       |       |       | 1025w | 1010 | 1.9   | 0.1  | δ(CCH <sub>3</sub> ) 68, δ(CC <sub>alk</sub> C <sub>alk</sub> ) 18                                                                                       |
| 981s  | 980sh  | 980m  | 980w   | 982s  | 982w   | 981s  | 981w  | 980s  |       | 952  | 57.5  | 13.8 | δ(CCH <sub>3</sub> ) 45, v(C <sub>alk</sub> C <sub>alk</sub> ) 17, v(C <sub>ar</sub> C <sub>alk</sub> ) 5, δ(CC=O) 5                                     |
|       | 968s   |       | 963s   | 967sh | 968s   |       | 965w  |       | 963w  |      |       |      | -                                                                                                                                                        |
| 940w  | 939m   | 940w  | 940w   | 940w  | 940w   |       |       |       |       | 906  | 2.9   | 0.1  | γ(CCH) 83, τ(CC) 7                                                                                                                                       |
| 911s  | 911s   | 912w  | 911m   | 912s  | 912s   |       | 912w  |       |       |      |       |      |                                                                                                                                                          |
| 899s  | 896s   | 894s  | 894s   | 899s  | 897s   |       | 898w  |       | 895w  | 880  | 10.3  | 6.7  | δ(NO <sub>2</sub> ) 19, v(C-N) 18, α(CC) 15, v(CCl) 10                                                                                                   |
|       |        |       |        |       |        |       |       |       |       | 872  | 47.1  | 0.4  | γ(CCH) 69, τ(CC) 15                                                                                                                                      |
| 860b  | 856s   | 860s  | 856s   | 860b  | 857s   | 856m  | 852m  | 855m  | 851m  | 869  | 66.9  | 0.7  | γ(COH) 86,* γ(CCH) 7                                                                                                                                     |
| 860b  |        | 837s  | 835w   | 860b  |        |       |       |       |       | 840  | 16.9  | 8.4  | α(CC) 33, v(C <sub>alk</sub> C <sub>alk</sub> ) 15, v(CCl) 10, v(CC) 10, v(C <sub>ar</sub> C <sub>alk</sub> ) 8, δ(NO <sub>2</sub> ) 5                   |
| 781s  | 781s   | 782s  | 782s   | 781s  | 781s   | 785s  | 785s  | 786s  | 787s  | 771  | 20.2  | 13.5 | γ(CNO <sub>2</sub> ) 18, δ(NO <sub>2</sub> ) 10, v(C <sub>ar</sub> C <sub>alk</sub> ) 7, v(CC) 6, v(CCl) 6, δ(CCN) 6, v(CO) 5, γ(CCN) 5                  |
| 773s  | 773    | 767s  | 767s   | 773m  | 773s   |       |       | 768w  | 768w  | 750  | 12.6  | 5.2  | τ(CC) 30, γ(CCO) 24, γ(CNO <sub>2</sub> ) 12, γ(CCN) 12, γ(CCC <sub>alk</sub> ) 6                                                                        |
| 724s  | 719s   | 737s  | 737s   | 725m  | 721s   | 723w  | 723w  | 731w  | 733w  | 716  | 42.0  | 1.9  | τ(CC) 23, γ(CCO) 17, δ(NO <sub>2</sub> ) 12, γ(CCC <sub>alk</sub> ) 9, γ(CNO <sub>2</sub> ) 7, α(CC) 6                                                   |
|       |        | 710m  | 709s   |       |        |       |       | 711w  | 711w  | 691  | 26.5  | 3.3  | τ(CC) 20, γ(CCO) 14, γ(CCC <sub>alk</sub> ) 12, γ(CNO <sub>2</sub> ) 11, v(CCl) 8, δ(NO <sub>2</sub> ) 7                                                 |
| 663s  | 653s   | 657m  | 648s   | 664m  | 654m   | 664w  | 653w  | 658w  | 652w  | 644  | 24.3  | 4.2  | δ(CCO) 16, δ(CC=O) 15, δ(C <sub>ar</sub> C <sub>alk</sub> ) 10, δ(NO <sub>2</sub> ) 8, v(C <sub>alk</sub> C <sub>alk</sub> ) 7, γ(CCC <sub>alk</sub> ) 6 |
|       | 625s   |       | 624s   | 633w  | 630m   |       |       |       |       |      |       |      | γ(COD)*                                                                                                                                                  |
|       |        | 607w  |        |       |        |       |       | 606w  |       | 588  | 13.5  | 3.4  | δ(CC <sub>alk</sub> C <sub>alk</sub> ) 20, τ(CC) 18, δ(CC=O) 15, δ(CCH <sub>3</sub> ) 11, γ(CCC <sub>alk</sub> ) 8, γ(CCN) 6                             |
| 588s  | 587s   | 583m  | 587s   | 589s  | 589s   | 590w  | 588w  | 583w  | 588w  | 568  | 12.9  | 1.9  | τ(CC) 31, γ(CCCl) 14, δ(CC=O) 15, δ(CC <sub>alk</sub> C <sub>alk</sub> ) 9, δ(CH <sub>3</sub> ) 6                                                        |
| 540s  | 540s   | 540m  | 539s   | 540m  | 541m   |       | 541w  |       |       | 525  | 9.2   | 0.8  | τ(CC) 46, γ(CCCl) 24, γ(CCO) 14                                                                                                                          |
| 454w  | 453w   |       |        | 460w  | 457w   | 453w  | 453w  |       |       | 464  | 1.7   | 0.9  | τ(CC) 22, δ(NO <sub>2</sub> ) 12, γ(CCN) 11, δ(CCO) 8, δ(CC=O) 7, γ(CCC <sub>alk</sub> ) 6, δ(CCC <sub>alk</sub> )6                                      |
|       |        | 441w  | 439w   | 445w  |        |       |       | 442w  | 438w  |      |       |      | -                                                                                                                                                        |

|      |      |       |      |      |      |           |     |     |      |                                                                                                                                                                                               |
|------|------|-------|------|------|------|-----------|-----|-----|------|-----------------------------------------------------------------------------------------------------------------------------------------------------------------------------------------------|
| 392w | 387w | 415sh | 414w | 416w | 416w |           | 433 | 1.3 | 2.6  | $\delta(\text{CC}=\text{O})$ 18, $\tau(\text{CC})$ 13, $\alpha(\text{CC})$ 19, $\delta(\text{CCO})$ 9, $\delta(\text{CCC}_{\text{alk}})$ 7, $\nu(\text{CarC}_{\text{alk}})$ 6                 |
|      |      | 409m  |      |      |      |           |     |     |      | $\nu_{\text{O}}(\text{OHO})^*$                                                                                                                                                                |
|      |      | 398w  | 393w |      | 393w | 395w 387s | 398 | 0.3 | 0.6  | $\tau(\text{CC})$ 35, $\gamma(\text{CCC}_{\text{alk}})$ 17, $\delta(\text{NO}_2)$ 9                                                                                                           |
|      |      | 374w  | 371w | 375s | 372s | 371s 370s | 380 | 4.0 | 2.8  | $\alpha(\text{CC})$ 18, $\delta(\text{CC}=\text{O})$ 17, $\delta(\text{CCO})$ 16, $\delta(\text{NO}_2)$ 7, $\tau(\text{CC})$ 7, $\delta(\text{CCl})$ 6                                        |
|      |      | 364w  | 360w |      |      |           | 357 | 0.9 | 10.6 | $\nu(\text{CCl})$ 38, $\alpha(\text{CC})$ 21, $\nu(\text{CC})$ 6, $\delta(\text{CC}=\text{O})$ 5                                                                                              |
|      |      | 354w  |      |      |      |           |     |     |      |                                                                                                                                                                                               |
|      |      | 341w  |      | 343w | 343w | 340w 335w | 344 | 3.9 | 0.6  | $\delta_{\text{alk}}(\text{CCC}_{\text{alk}})$ 14, $\alpha(\text{CC})$ 13, $\nu(\text{CarC}_{\text{alk}})$ 11, $\delta(\text{CCO})$ 9, $\delta(\text{CCl})$ 8                                 |
|      |      | 328w  | 321w | 322m | 320s |           | 318 | 0.6 | 1.2  | $\gamma(\text{CCCl})$ 20, $\gamma(\text{CCN})$ 17, $\tau(\text{CC})$ 24, $\gamma(\text{CCC}_{\text{alk}})$ 10, $\gamma(\text{CCO})$ 8, $\delta(\text{NO}_2)$ 7                                |
|      |      | 308w  |      |      |      | 313w 310w | 293 | 4.2 | 6.1  | $\delta(\text{CC}=\text{O})$ 28, $\nu(\text{C-N})$ 14, $\delta(\text{CCl})$ 12, $\alpha(\text{CC})$ 6                                                                                         |
|      |      |       |      |      |      | 245 245w  |     |     |      |                                                                                                                                                                                               |
|      |      | 200w  | 193w | 199w | 199w | 203w      |     |     |      |                                                                                                                                                                                               |
|      |      | 190w  |      | 190w | 190w | 194w 194w |     |     |      |                                                                                                                                                                                               |
|      |      | 182w  | 182w | 182w | 182w |           | 175 | 0.8 | 2.4  | $\tau(\text{CC})$ 28, $\gamma(\text{CCC}_{\text{alk}})$ 17, $\gamma(\text{COH})$ 14, $\gamma(\text{CCN})$ 12, $\delta(\text{CC}_{\text{alk}}\text{C}_{\text{alk}})$ 6, $\gamma(\text{CCH})$ 5 |
|      |      |       |      |      |      | 175w 178w | 169 | 1.6 | 0.7  | $\delta(\text{CCC}_{\text{alk}})$ 39, $\delta(\text{CCN})$ 27, $\delta(\text{CC}=\text{O})$ 5                                                                                                 |
|      |      | 161w  |      |      |      |           | 164 | 1.7 | 2.2  | $\delta(\text{CCl})$ 49, $\delta(\text{CCN})$ 25, $\delta(\text{CCC}_{\text{alk}})$ 6                                                                                                         |
|      |      |       | 155w |      |      |           | 145 | 0.1 | 0.6  | $\tau(\text{CH}_3)$ 75, $\delta(\text{CCH}_3)$ 11                                                                                                                                             |
|      |      | 130w  | 127w |      |      |           | 134 | 0.3 | 0.3  | $\tau(\text{CC})$ 32, $\tau(\text{CC}_{\text{alk}})$ 16, $\gamma(\text{CCC}_{\text{alk}})$ 13, $\gamma(\text{COH})$ 13, $\gamma(\text{CCCl})$ 9                                               |
|      |      | 106w  |      |      |      |           | 104 | 3.4 | 0.2  | $\gamma(\text{COH})$ 31, $\tau(\text{CC}_{\text{alk}})$ 28, $\gamma(\text{CCN})$ 14, $\gamma(\text{CCC}_{\text{alk}})$ 12, $\gamma(\text{CCCl})$ 6                                            |
|      |      | 98w   | 98w  |      |      |           |     |     |      |                                                                                                                                                                                               |
|      |      | 78w   |      |      |      |           |     |     |      |                                                                                                                                                                                               |
|      |      | 74w   | 74w  |      |      |           |     |     |      |                                                                                                                                                                                               |
|      |      | 62w   |      |      |      |           | 59  | 0.6 | 0.5  | $\tau(\text{CC}_{\text{alk}})$ 49, $\tau(\text{CC})$ 34                                                                                                                                       |
|      |      | 51w   |      |      |      |           | 42  | 0.7 | 2.4  | $\tau(\text{NO}_2)$ 68, $\delta(\text{CCO})$ 8, $\delta(\text{CCN})$ 6                                                                                                                        |

Abbreviations s, m, w, vb, b and sh mean strong, middle, weak, very broad, broad and shoulder of experimental bands, respectively.

\*—data obtained on basis of frequency isotopic ratio analysis.

**Table S3.** Experimental infrared spectra measured under the matrix condition and calculated DFT (6-311++G(2d,2p)) spectroscopic data for 5-chloro-3-nitro-2-hydroxyacetophenone and its mono deuterated derivative (OD). Potential Energy Distribution (PED) calculated with GAR2PED program.<sup>42</sup>

| IR <sub>exp</sub> | IR <sub>exp</sub> | DFT  |       |       | PED                                                                                                             | Conformer |
|-------------------|-------------------|------|-------|-------|-----------------------------------------------------------------------------------------------------------------|-----------|
| 10 K              | 10 K              |      | IR(A) | R(A)  |                                                                                                                 |           |
| OH                | OD                | OH   |       |       |                                                                                                                 |           |
| 3100w             | 3095w             | 3127 | 12.2  | 52.5  | v(C <sub>ar</sub> H) 99                                                                                         |           |
| 3060w             | 3084w             | 3119 | 0.1   | 51.2  | v(C <sub>ar</sub> H) 99                                                                                         |           |
| 3016w             | 3013w             | 3057 | 0.1   | 115.8 | v(C <sub>alk</sub> H) 99                                                                                        |           |
| 2993w             | 2991w             |      |       |       |                                                                                                                 |           |
| 2941w             | 2940w             | 3006 | 3.3   | 46.3  | v(C <sub>alk</sub> H) 99                                                                                        |           |
| 2890w             | 2900w             | 2944 | 0.8   | 161.0 | v(C <sub>alk</sub> H) 100                                                                                       |           |
| 3000              | 2339              | 3077 | 491.4 | 113.3 | v(OH) /v(OH) 100                                                                                                |           |
| 1700s             | 1700s             | 1646 | 291.6 | 62.6  | v(C=O) 52, δ(CCC <sub>alk</sub> ) 8                                                                             | A         |
| 1667s             | 1659s             |      |       |       | -                                                                                                               | B         |
| 1624w             | 1626w             |      |       |       |                                                                                                                 |           |
| 1615s             | 1612s             | 1595 | 50.0  | 9.8   | v(CC) 45, v(C=O) 13, v <sup>a</sup> (NO <sub>2</sub> ) 7, δ(CH) 7                                               |           |
| 1592s             | 1590w             | 1563 | 110.5 | 48.6  | v(CC) 45, δ(COH) 19, δ(CCO) 7, δ(CH) 6, α(CC) 6                                                                 |           |
| 1571w             | 1572s             |      |       |       |                                                                                                                 |           |
| 1567w             | 1564s             |      |       |       |                                                                                                                 |           |
| 1550s             | 1548s             | 1551 | 213.3 | 22.7  | v <sup>a</sup> (NO <sub>2</sub> ) 68, v(CC) 6                                                                   | B         |
| 1539s             | 1535s             |      |       |       | -                                                                                                               | A         |
| 1458s             | 1458s             | 1433 | 205.0 | 9.0   | v(CC) 27, δ(COH) 19, v(CO) 16, δ(CH) 10                                                                         |           |
| 1449s             | 1449s             |      |       |       |                                                                                                                 |           |
| 1436s             | 1433s             | 1432 | 13.6  | 9.8   | δ(CCH <sub>3</sub> ) 94                                                                                         |           |
| 1418w             | 1419w             | 1422 | 58.1  | 15.4  | δ(CCH <sub>3</sub> ) 70, v(CO) 6                                                                                |           |
|                   | 1401s             | 1407 | 3.1   | 33.5  | v(CC) 30, v(C=O) 11, v(CO) 9, δ(COH) 7, δ(CCH <sub>3</sub> ) 7, δ(CCC <sub>alk</sub> ) 5                        |           |
| 1374m             | 1363s             | 1372 | 101.5 | 21.3  | v(CC) 24, δ(COH) 22, δ(CH) 14, v(C <sub>ar</sub> C <sub>alk</sub> ) 5                                           |           |
|                   |                   | 1353 | 54.4  | 5.6   | δ(CCH <sub>3</sub> ) 66, v(C <sub>alk</sub> C <sub>alk</sub> ) 11                                               |           |
| 1356s             | 1358s             | 1333 | 223.8 | 99.8  | v <sup>s</sup> (NO <sub>2</sub> ) 49, v(C-N) 17, δ(NO <sub>2</sub> ) 13, δ(CH) 5                                | B         |
| 1346s             | 1335s             |      |       |       |                                                                                                                 |           |
| 1316m             | 1316m             | 1302 | 61.6  | 13.6  | v(CC) 40, v(C <sub>ar</sub> C <sub>alk</sub> ) 12, δ(CC=O) 11, δ(CCH <sub>3</sub> ) 9, δ(CCC <sub>alk</sub> ) 6 |           |
| 1303s             | 1304s             |      |       |       | v <sup>s</sup> (NO <sub>2</sub> ) 49, v(C-N) 17, δ(NO <sub>2</sub> ) 13, δ(CH) 5                                | A         |
| 1288w             | 1267sh            | 1284 | 37.9  | 83.9  | v(CO) 29, v(CC) 34, δ(CH) 12                                                                                    |           |
| 1269s             | 1254w             |      |       |       | δ(COH)*                                                                                                         | B         |
| 1243s             | 1246s             | 1238 | 258.5 | 14.4  | v(C <sub>ar</sub> C <sub>alk</sub> ) 22, δ(CH) 17, v(CC) 29, v(C <sub>alk</sub> C <sub>alk</sub> ) 6            |           |
|                   | 1229w             |      |       |       |                                                                                                                 |           |
| 1211w             | 1212w             |      |       |       |                                                                                                                 |           |
|                   | 1201w             |      |       |       |                                                                                                                 |           |
| 1188w             |                   | 1170 | 1.1   | 5.6   | δ(CH) 32, v(CC) 24, δ(CCO) 10, v(C-N) 8, δ(COH) 6                                                               |           |
| 1166s             | 1166w             |      |       |       | δ(COH)*                                                                                                         | A         |
| 1136w             |                   |      |       |       |                                                                                                                 |           |
| 1124s             | 1132m             | 1112 | 29.6  | 31.8  | v(CC) 32, δ(CH) 18, v(CCl) 12, v(C <sub>alk</sub> C <sub>alk</sub> ) 6                                          |           |
| 1104w             | 1110w             | 1078 | 35.0  | 4.9   | α(CC) 21, v(CC) 17, δ(CCH <sub>3</sub> ) 10, v(C-N) 9, δ(CH) 8, v(C <sub>alk</sub> C <sub>alk</sub> )           |           |

|       |       |      |      |      |                                                                                                                                                                                                                                     |          |
|-------|-------|------|------|------|-------------------------------------------------------------------------------------------------------------------------------------------------------------------------------------------------------------------------------------|----------|
| 1100w | 1096w |      |      |      | 7, $\delta(\text{CH})$ 6                                                                                                                                                                                                            |          |
| 1086w |       |      |      |      |                                                                                                                                                                                                                                     |          |
| 1028w | 1028m | 1010 | 1.9  | 0.1  | $\delta(\text{CCH}_3)$ 68, $\delta(\text{CC}_{\text{alk}}\text{C}_{\text{alk}})$ 18                                                                                                                                                 |          |
| 976   | 976m  | 952  | 57.5 | 13.8 | $\delta(\text{CCH}_3)$ 45, $\nu(\text{C}_{\text{alk}}\text{C}_{\text{alk}})$ 17, $\nu(\text{C}_{\text{ar}}\text{C}_{\text{alk}})$ 5, $\delta(\text{CC}=\text{O})$ 5                                                                 |          |
|       | 959m  |      |      |      | $\delta(\text{COD})^*$                                                                                                                                                                                                              | <b>B</b> |
|       | 942w  |      |      |      |                                                                                                                                                                                                                                     |          |
| 907   | 906w  | 906  | 2.9  | 0.1  | $\gamma(\text{CCH})$ 83, $\tau(\text{CC})$ 7                                                                                                                                                                                        |          |
| 898w  | 895s  | 880  | 10.3 | 6.7  | $\delta(\text{NO}_2)$ 19, $\nu(\text{C}-\text{N})$ 18, $\alpha(\text{CC})$ 15, $\nu(\text{CCl})$ 10                                                                                                                                 |          |
|       | 895s  |      |      |      | $\delta(\text{COD})^*$                                                                                                                                                                                                              | <b>A</b> |
| 859w  | 857s  | 872  | 47.1 | 0.4  | $\gamma(\text{CCH})$ 69, $\tau(\text{CC})$ 15                                                                                                                                                                                       |          |
|       |       | 840  | 16.9 | 8.4  | $\nu(\text{C}_{\text{alk}}\text{C}_{\text{alk}})$ 15, $\alpha(\text{CC})$ 33, $\nu(\text{CCl})$ 10, $\nu(\text{CC})$ 10, $\nu(\text{C}_{\text{ar}}\text{C}_{\text{alk}})$ 8, $\delta(\text{NO}_2)$ 5                                |          |
| 823w  |       | 869  | 66.9 | 0.7  | $\gamma(\text{COH})^*$ 86, $\gamma(\text{CCH})$ 7                                                                                                                                                                                   | <b>B</b> |
| 788w  | 787m  | 771  | 20.2 | 13.5 | $\gamma(\text{CNO}_2)$ 18, $\delta(\text{NO}_2)$ 10, $\nu(\text{C}_{\text{ar}}\text{C}_{\text{alk}})$ 7, $\nu(\text{CC})$ 6, $\nu(\text{CCl})$ 6, $\delta(\text{CCN})$ 6, $\nu(\text{CO})$ 5, $\gamma(\text{CCN})$ 5                |          |
| 772s  | 772s  | 750  | 12.6 | 5.2  | $\tau(\text{CC})$ 30, $\gamma(\text{CCO})$ 24, $\gamma(\text{CCN})$ 12, $\gamma(\text{CNO}_2)$ 12, $\gamma(\text{CCC}_{\text{alk}})$ 6                                                                                              |          |
| 736s  | 731s  | 716  | 42.0 | 1.9  | $\tau(\text{CC})$ 23, $\gamma(\text{CCO})$ 17, $\delta(\text{NO}_2)$ 12, $\gamma(\text{CCC}_{\text{alk}})$ 9, $\gamma(\text{CNO}_2)$ 7, $\alpha(\text{CC})$ 6                                                                       |          |
|       | 719w  |      |      |      | $\gamma(\text{COH})^*$                                                                                                                                                                                                              | <b>A</b> |
| 711   | 708w  | 691  | 26.5 | 3.3  | $\tau(\text{CC})$ 20, $\gamma(\text{CCO})$ 14, $\gamma(\text{CCC}_{\text{alk}})$ 12, $\gamma(\text{CNO}_2)$ 11, $\nu(\text{CCl})$ 8, $\delta(\text{NO}_2)$ 7                                                                        |          |
| 661w  | 653w  | 644  | 24.3 | 4.2  | $\delta(\text{CCO})$ 16, $\delta(\text{CC}=\text{O})$ 15, $\delta(\text{C}_{\text{ar}}\text{C}_{\text{alk}})$ 10, $\delta(\text{NO}_2)$ 8, $\nu(\text{C}_{\text{alk}}\text{C}_{\text{alk}})$ 7, $\gamma(\text{CCC}_{\text{alk}})$ 6 |          |
| 648w  | 636w  |      |      |      |                                                                                                                                                                                                                                     |          |
|       | 619w  |      |      |      | $\gamma(\text{COD})^*$                                                                                                                                                                                                              | <b>B</b> |
| 604m  | 604m  | 588  | 13.5 | 3.4  | $\delta(\text{CC}_{\text{alk}}\text{C}_{\text{alk}})$ 20, $\tau(\text{CC})$ 18, $\delta(\text{CC}=\text{O})$ 15, $\delta(\text{CCH}_3)$ 11, $\gamma(\text{CCC}_{\text{alk}})$ 8, $\gamma(\text{CCN})$ 6                             |          |
| 591m  | 591s  | 568  | 12.9 | 1.9  | $\tau(\text{CC})$ 31, $\gamma(\text{CCCl})$ 14, $\delta(\text{CC}=\text{O})$ 15, $\delta(\text{CC}_{\text{alk}}\text{C}_{\text{alk}})$ 9, $\delta(\text{CH}_3)$ 6                                                                   |          |
| 583w  | 587w  |      |      |      |                                                                                                                                                                                                                                     |          |
|       | 579m  |      |      |      |                                                                                                                                                                                                                                     |          |
| 549w  |       | 525  | 9.2  | 0.8  | $\tau(\text{CC})$ 46, $\gamma(\text{CCCl})$ 24, $\gamma(\text{CCO})$ 14                                                                                                                                                             |          |
|       | 534s  |      |      |      | $\gamma(\text{COD})^*$                                                                                                                                                                                                              | <b>A</b> |

Abbreviations s, m and w mean strong, middle and weak bands, respectively.

\*—data obtained on basis of frequency isotopic ratio analysis.

**Table S4.** Experimental incoherent inelastic neutron scattering and calculated DFT data for CNK and mono deuterated (CNK-OD) derivative. Distribution (PED) calculated with GAR2PED program.<sup>42</sup>

| CNK   | CNK-OD | $\Delta$ freq.DFT | PED                                                                                                                                                                                       |
|-------|--------|-------------------|-------------------------------------------------------------------------------------------------------------------------------------------------------------------------------------------|
| 1202w | 1186w  | 1238              | $\nu(\text{CarCalk})$ 22, $\delta(\text{CH})$ 17, $\nu(\text{CC})$ 29, $\nu(\text{CalkCalk})$ 6                                                                                           |
| 1156m | 1171m  | 1170              | $\delta(\text{CH})$ 32, $\nu(\text{CC})$ 24, $\delta(\text{CCO})$ 10, $\nu(\text{C-N})$ 8, $\delta(\text{COH})$ 6                                                                         |
|       | 1127m  | 44                | -                                                                                                                                                                                         |
| 1099w | 1085w  | 1112              | $\alpha(\text{CC})$ 21, $\nu(\text{CC})$ 17, $\delta(\text{CCH}_3)$ 10, $\nu(\text{C-N})$ 9, $\delta(\text{CH})$ 8, $\nu(\text{CalkCalk})$ 7, $\delta(\text{CH})$ 6                       |
| 1045m | 1032m  | 1010              | $\delta(\text{CCH}_3)$ 68, $\delta(\text{CCalkCalk})$ 18                                                                                                                                  |
| 996m  | 996w   | 952               | $\delta(\text{CCH}_3)$ 45, $\nu(\text{CalkCalk})$ 17, $\nu(\text{CarCalk})$ 5, $\delta(\text{CC=O})$ 5                                                                                    |
| 949m  | 949m   | 906               | $\gamma(\text{CCH})$ 83, $\tau(\text{CC})$ 7                                                                                                                                              |
| 916m  | 927m   | 22                | -                                                                                                                                                                                         |
| 916m  |        | 869               | $\gamma(\text{COH})$ 86,* $\gamma(\text{CCH})$ 7                                                                                                                                          |
| 895m  |        | 21                | -                                                                                                                                                                                         |
| 875sh | 865w   | 872               | $\gamma(\text{CCH})$ 69, $\tau(\text{CC})$ 15                                                                                                                                             |
| 860sh | 856w   |                   |                                                                                                                                                                                           |
| 837w  | 827w   |                   |                                                                                                                                                                                           |
| 791w  | 783w   | 771               | $\gamma(\text{CNO}_2)$ 18, $\delta(\text{NO}_2)$ 10, $\nu(\text{CarCalk})$ 7, $\nu(\text{CC})$ 6, $\nu(\text{CCl})$ 6, $\delta(\text{CCN})$ 6, $\nu(\text{CO})$ 5, $\gamma(\text{CCN})$ 5 |
| 766w  |        | 750               | $\tau(\text{CC})$ 30, $\gamma(\text{CCO})$ 24, $\gamma(\text{CNO}_2)$ 12, $\gamma(\text{CCN})$ 12, $\gamma(\text{CCCalk})$ 6                                                              |
| 742w  | 742w   |                   |                                                                                                                                                                                           |
|       | 727w   |                   | $\gamma(\text{COD})^*$                                                                                                                                                                    |
| 712w  | 712w   |                   |                                                                                                                                                                                           |
|       | 704w   |                   |                                                                                                                                                                                           |
| 675w  |        | 644               | $\delta(\text{CCO})$ 16, $\delta(\text{CC=O})$ 15, $\delta(\text{CarCalk})$ 10, $\delta(\text{NO}_2)$ 8, $\nu(\text{CalkCalk})$ 7, $\gamma(\text{CCCalk})$ 6                              |
|       | 675vw  |                   | $\gamma(\text{COD})^*$                                                                                                                                                                    |
|       | 656w   | 19                |                                                                                                                                                                                           |
| 600m  | 594m   | 588               | $\delta(\text{CCalkCalk})$ 20, $\tau(\text{CC})$ 18, $\delta(\text{CCH}_3)$ 11, $\delta(\text{CC=O})$ 15, $\gamma(\text{CCCalk})$ 8, $\gamma(\text{CCN})$ 6                               |
| 545m  | 546m   | 55/48             | -                                                                                                                                                                                         |
| 519w  | 516w   |                   |                                                                                                                                                                                           |
| 502w  |        |                   |                                                                                                                                                                                           |
| 467m  | 463m   | 464               | $\tau(\text{CC})$ 22, $\delta(\text{NO}_2)$ 12, $\gamma(\text{CCN})$ 11, $\delta(\text{CCO})$ 8, $\delta(\text{CC=O})$ 7, $\gamma(\text{CCCalk})$ 6, $\delta(\text{CCCalk})$ 6            |
| 448m  | 448m   | 19/15             | -                                                                                                                                                                                         |
| 411m  | 418m   |                   | $\nu_\sigma(\text{OHO})^*$                                                                                                                                                                |
| 405m  | 398m   |                   | -                                                                                                                                                                                         |
| 375m  | 370m   |                   | -                                                                                                                                                                                         |
| 367m  | 355m   |                   | -                                                                                                                                                                                         |
| 336   | 336    | 357               | $\nu(\text{CCl})$ 38, $\alpha(\text{CC})$ 21, $\nu(\text{CC})$ 6, $\delta(\text{CC=O})$ 5                                                                                                 |
| 309   | 309    | 27                | -                                                                                                                                                                                         |
| 279w  | 279w   |                   |                                                                                                                                                                                           |
| 202w  | 200w   | 175               | $\tau(\text{CC})$ 28, $\gamma(\text{CCCalk})$ 17, $\gamma(\text{COH})$ 14, $\gamma(\text{CCN})$ 12, $\delta(\text{CCalkCalk})$ 6, $\gamma(\text{CCH})$ 5                                  |
| 176s  | 176s   | 145               | $\tau(\text{CH}_3)$ 75, $\delta(\text{CCH}_3)$ 11                                                                                                                                         |
| 165   | 165    |                   | lattice modes                                                                                                                                                                             |
| 106   | 105    |                   | -                                                                                                                                                                                         |
| 94    | 95     |                   | -                                                                                                                                                                                         |
| 62    | 62     |                   | -                                                                                                                                                                                         |
| 50    | 50     |                   | -                                                                                                                                                                                         |

Abbreviations s, m and w mean strong, middle and weak bands, respectively. \*—data obtained on basis of isotopic effect.



**Table S5.** Crystal data and structure refinement for polymorphs **I** and **II**.

| Compound                                         | Polymorph I               | Polymorph II                                    | Polymorph II                |
|--------------------------------------------------|---------------------------|-------------------------------------------------|-----------------------------|
| Empirical formula                                |                           | C <sub>8</sub> H <sub>6</sub> ClNO <sub>2</sub> |                             |
| Formula weight                                   |                           | 183.59                                          |                             |
| Temperature [K]                                  | 200(2)                    | 200(2)                                          | 100(2)                      |
| Wavelength[Å]                                    |                           | 0.71073                                         |                             |
| Crystal system                                   |                           | Monoclinic                                      | Monoclinic                  |
| Space group                                      | Pccn                      | P21/c                                           | P21/c                       |
| Unit cell dimensions                             |                           |                                                 |                             |
| a [Å]                                            | 7.65370(10)               | 8.0648(3)                                       | 8.0378(4)                   |
| b [Å]                                            | 14.0388(3)                | 15.4442(6)                                      | 15.3927(8)                  |
| c [Å]                                            | 16.3184(2)                | 6.8597(3)                                       | 6.7766(3)                   |
|                                                  | 90                        | 90.752(3)                                       | 90.667(4)                   |
| Volume [Å <sup>3</sup> ]                         | 1753.39(5)                | 854.33(6)                                       | 838.37(7)                   |
| Z                                                | 8                         | 4                                               | 4                           |
| Calculated density [Mg/m <sup>3</sup> ]          | 1.391                     | 1.427                                           | 1.455                       |
| Absorption coefficient [mm <sup>-1</sup> ]       | 0.392                     | 0.402                                           | 0.410                       |
| F(000)                                           | 752                       | 376                                             | 376                         |
| Crystal size [mm]                                |                           |                                                 |                             |
| Theta range for data collection [°]              | 2.496 to 26.800           | 3.250 to 36.744                                 | 2.534 to 24.285             |
| Index ranges                                     | -9 ≤ h ≤ 8                | -12 ≤ h ≤ 10                                    | 9 ≤ h ≤ 9                   |
|                                                  | -17 ≤ k ≤ 14              | -22 ≤ k ≤ 21                                    | -17 ≤ k ≤ 17                |
|                                                  | -20 ≤ l ≤ 19              | -8 ≤ l ≤ 11                                     | -7 ≤ l ≤ 7                  |
| Reflections collected/unique                     | 7126/1842                 | 9641/3235                                       | 4462/1311                   |
|                                                  | [R(int) = 0.0583]         | [R(int) = 0.1045]                               | [R(int) = 0.0598]           |
| Data/restraints/parameters                       | 1842/0/151                | 3235/0/132                                      | 1311/0/132                  |
| Goodness-of-fit on F <sup>2</sup>                | 1.231                     | 1.062                                           | 1.036                       |
| Final R indices [I>2sigma(I)]                    | R1 = 0.0597, wR2 = 0.1468 | R1 = 0.0601<br>wR2 = 0.1631                     | R1 = 0.0545<br>wR2 = 0.1469 |
| R indices (all data)                             | R1 = 0.0662, wR2 = 0.1600 | R1 = 0.0751<br>wR2 = 0.1825                     | R1 = 0.0576<br>wR2 = 0.1539 |
| Largest diff. peak and hole [e Å <sup>-3</sup> ] | 0.380 and -0.620          | 0.596 and -0.549                                | 0.589 and -0.437            |
